# Supplementary material for: Antagonizing Arachidonic Acid-Derived Eicosanoids Reduces Inflammatory Th17 and Th1 Cell-Mediated Inflammation and Colitis Severity
Source: Hindawi journal article supplement (doi:10.1155/2014/917149), 2014-01-01
Supplement: f1 [file 917149.f1.pdf]

**Supplemental Table 1.** Final body weights and colon lengths of Wt and *Fat-1* saline control and TNBS-treated mice<sup>1</sup>

|                   | Saline Control            |                           | TNBS                      |                           |
|-------------------|---------------------------|---------------------------|---------------------------|---------------------------|
|                   | Wt                        | <i>Fat-1</i>              | Wt                        | <i>Fat-1</i>              |
| Body Weight (g)   | 24.09 ± 0.66 <sup>*</sup> | 23.01 ± 0.82 <sup>*</sup> | 18.75 ± 0.64 <sup>‡</sup> | 19.89 ± 0.84 <sup>‡</sup> |
| Colon Length (cm) | 6.11 ± 0.16 <sup>*</sup>  | 5.92 ± 0.20 <sup>*</sup>  | 4.82 ± 0.13 <sup>‡</sup>  | 5.14 ± 0.52 <sup>‡</sup>  |

<sup>1</sup>Mean values ± SEM of saline control (n=4/genotype) and TNBS-treated Wt and *Fat-1* mice (n=9/genotype). Within rows, values not sharing a superscript symbol differ ( $P \leq 0.05$ ).

**Supplemental Table 2.** Final body weights and colon lengths *Fads1* saline control and TNBS-treated mice<sup>1</sup>

|                   | Saline Control          |                         |                         | TNBS                    |                         |                         |
|-------------------|-------------------------|-------------------------|-------------------------|-------------------------|-------------------------|-------------------------|
|                   | Wt                      | Het                     | Null                    | Wt                      | Het                     | Null                    |
| Body Weight (g)   | 22.53±1.66 <sup>*</sup> | 22.13±1.20 <sup>*</sup> | 19.23±1.18 <sup>*</sup> | 18.86±1.23 <sup>‡</sup> | 16.39±0.86 <sup>‡</sup> | 16.75±1.14 <sup>‡</sup> |
| Colon Length (cm) | 6.40±0.13 <sup>*</sup>  | 6.10±0.12 <sup>*</sup>  | 6.30±0.12 <sup>*</sup>  | 5.53±0.26 <sup>‡</sup>  | 5.33±0.25 <sup>‡</sup>  | 5.48±0.32 <sup>‡</sup>  |

<sup>1</sup>Mean values ± SEM of Wt, Het and Null *Fads1* saline control (n=4/genotype) and TNBS-treated mice (n=6-9/genotype). Values marked with a different superscript symbol differ ( $P \leq 0.05$ ).

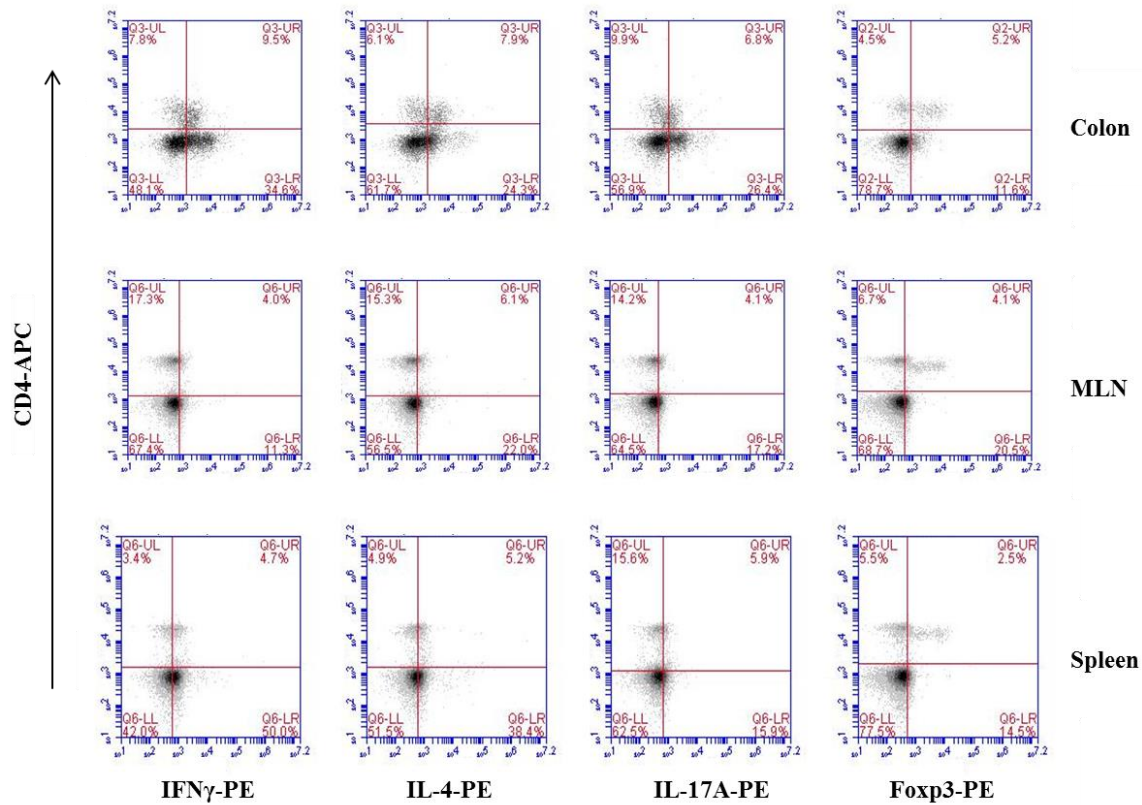

**Supplemental Figure 1.** Representative dot plots depicting the detection of CD4<sup>+</sup> T cell subsets in TNBS-treated Wt colon lamina propria (top row), MLN (middle row) and spleen (bottom row). All cells were surface stained with CD4-APC (y axis) followed by intracellular detection of T cell subset specific markers (x axis): IFN $\gamma$ -PE (Th1), IL-4-PE (Th2), IL-17A-PE (Th17) and Foxp3-PE (Treg) (see Materials and Methods). Flow cytometric analyses were conducted using an Accuri C6 flow cytometer (Accuri Cytometers).

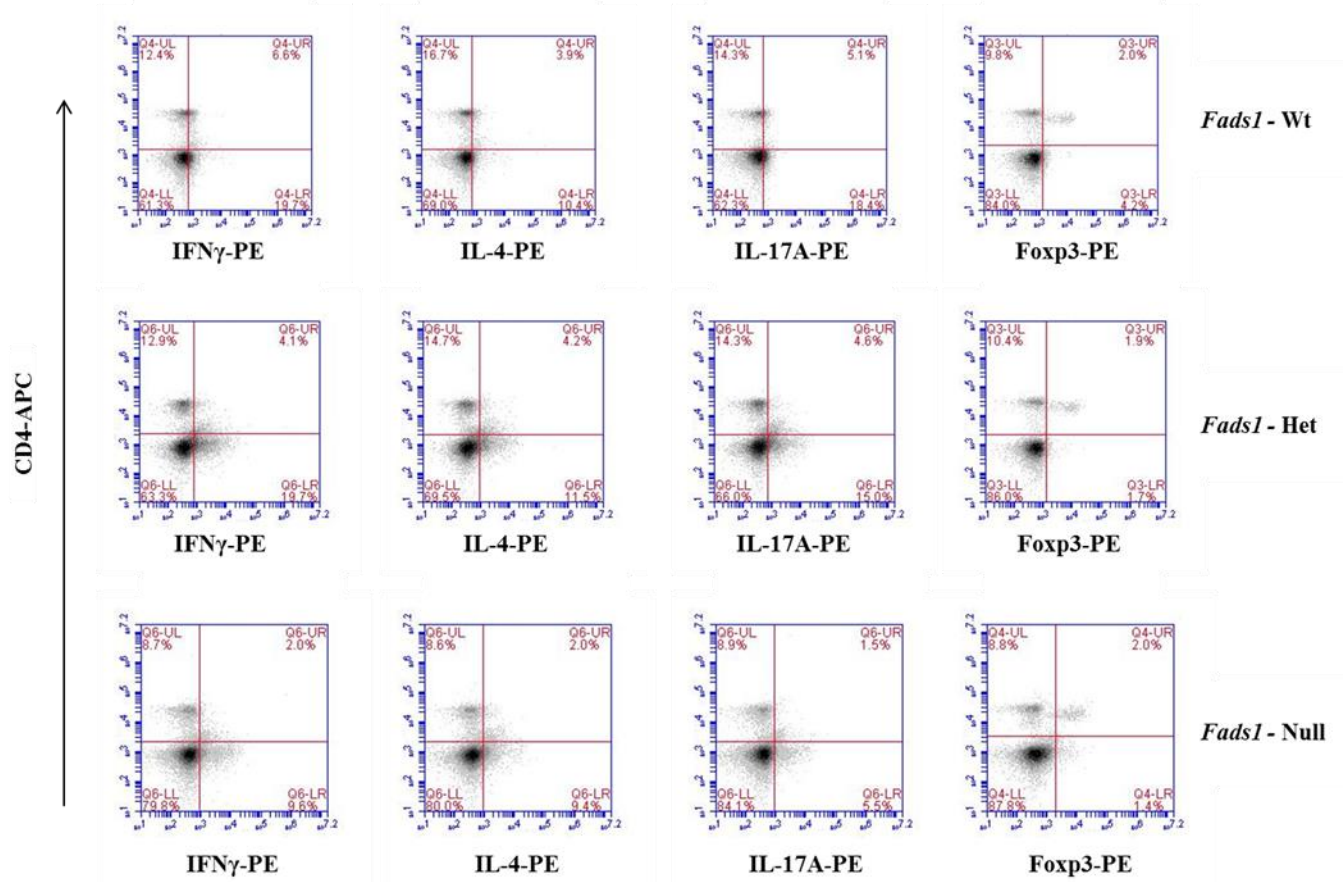

**Supplemental Figure 2.** Representative dot plots depicting the detection of splenic CD4<sup>+</sup> T cell subsets in TNBS-treated *Fads1* Wt (top row), Het (middle row) and Null mice (bottom row). All cells were surface stained with CD4-APC (y axis) followed by intracellular detection of T cell subset specific markers (x axis): IFN $\gamma$ -PE (Th1), IL-4-PE (Th2), IL-17A-PE (Th17) and Foxp3-PE (Treg) (see Materials and Methods). Flow cytometric analyses were conducted using an Accuri C6 flow cytometer (Accuri Cytometers).
